# Supplementary material for: Peribiliary Glands Are Key in Regeneration of the Human Biliary Epithelium After Severe Bile Duct Injury
Source: PubMed Central journal article supplement — Hepatology. 2019 Mar 5;69(4):1719–34. doi: 10.1002/hep.30365 (PMC6594148; doi:10.1002/hep.30365), 2019-03-05
Supplement: HEP-69-1719-s001.pdf [file HEP-69-1719-s001.pdf]

## Supplementary Tables

| Name              | Host   | Supplier        | Catalog no.  | Dilution     |
|-------------------|--------|-----------------|--------------|--------------|
| alpha-SMA         | Mouse  | Dako Cytomation | M8051        | 1:100        |
| calretinin        | Rabbit | Ventana         | 0599-2184001 | Ready-to-use |
| CFTR              | Rabbit | Santa Cruz      | SC-10747     | 1:50         |
| CK19              | Mouse  | Dako Cytomation | M0888        | 1:100        |
| cleaved caspase-3 | Rabbit | Cell Signaling  | #9664S       | 1:50         |
| EpCAM             | Mouse  | Ventana         | 760-4383     | Ready-to-use |
| Ki-67             | Mouse  | Dako Cytomation | M7240        | 1:300        |
| Nanog             | Rabbit | Cell Signaling  | #5448S       | 1:25         |
| pCK               | Rabbit | Dako Cytomation | Z0622        | 1:50         |
| secretin receptor | Rabbit | Sigma           | AT12431      | 1:100        |
| SOX9              | Rabbit | Millipore       | AB5535       | 1:300        |
| VWF               | Mouse  | Dako Cytomation | M0616        | 1:100        |

### Supplementary Table 1. List of antibodies used in this study.

Abbreviations: Alpha-SMA, alpha-smooth muscle actin; CFTR, cystic fibrosis transmembrane conductance regulator; CK19, cytokeratin 19; EpCAM, epithelial cell adhesion molecule; Nanog, homeobox protein Nanog; pCK, pan cytokeratin; SOX9, sex determining region Y-box 9; VWF, von Willebrand factor.

| Liver no. | Gender | Age (years) | BMI (kg/m <sup>2</sup> ) | DCD/DBD | DWIT <sup>1</sup> (min) | CIT <sup>2</sup> (h:min) | Reason declined    |
|-----------|--------|-------------|--------------------------|---------|-------------------------|--------------------------|--------------------|
| 1         | M      | 64          | 46                       | DBD     | NA                      | NA                       | Steatosis          |
| 2         | F      | 44          | 26                       | DCD     | 18                      | 8:30                     | High liver enzymes |
| 3         | F      | 15          | 27                       | DCD     | 28                      | 4:21                     | No match found     |
| 4         | M      | 29          | 24                       | DCD     | 31                      | 8:31                     | High liver enzymes |
| 5         | F      | 61          | 21                       | DCD     | 15                      | 14:37                    | DCD + age          |
| 6         | M      | 66          | 28                       | DCD     | 31                      | 16:12                    | DCD + age          |
| 7         | F      | 47          | 29                       | DCD     | 23                      | 9:36                     | Steatosis          |
| 8         | M      | 34          | 25                       | DCD     | 43                      | 19:51                    | DWIT too long      |
| 9         | M      | 71          | 26                       | DCD     | 24                      | 15:35                    | DCD + age          |
| 10        | M      | 69          | 27                       | DCD     | 48                      | 7:10                     | DCD + age          |
| 11        | F      | 44          | 28                       | DCD     | 13                      | 6:34                     | Steatosis          |
| 12        | F      | 64          | 20                       | DCD     | 13                      | 11:44                    | DCD + age          |
| 13        | M      | 57          | 29                       | DCD     | 16                      | 12:07                    | Steatosis          |
| 14        | F      | 62          | 28                       | DCD     | 14                      | 11:46                    | Steatosis          |
| 15        | M      | 69          | 25                       | DCD     | 16                      | 6:29                     | Age, iv drugs use  |
| 16        | F      | 67          | 28                       | DCD     | 19                      | 9:15                     | DCD + age          |

**Supplementary Table 2. Donor characteristics.**

Abbreviations: BMI, body mass index; CIT, cold ischemia time; DBD, donation after brain death; DCD, donation after circulatory death; DWIT, donor warm ischemia time; NA, not applicable.

<sup>1</sup>DWIT: time between circulatory arrest and *in situ* cold flush in DCD donors.

<sup>2</sup>CIT: time between donor cold flush and start of slicing procedure with oxygenated Krebs-Henseleit buffer.
